# Supplementary material for: Expression of Ac-PK2 protein from AcMNPV improved the progeny virus productionviaregulation of energy metabolism and protein synthesis
Source: Royal Society of Chemistry journal article supplement (doi:10.1039/c8ra05172k), 2018-01-01
Supplement: c8ra05172k1.pdf [file c8ra05172k1.pdf]

## **Expression of Ac-PK2 protein from AcMNPV improved the progeny virus production via regulation of energy metabolism and protein synthesis**

Lili Wei, Aihua Liang & Yuejun Fu

Key Laboratory of Chemical Biology and Molecular Engineering of Ministry of Education, Institute of Biotechnology, Shanxi University, Taiyuan 030006, China.

In correspondence and requests for materials should be addressed to Y. F.

(email: [yjfu@sxu.edu.cn](mailto:yjfu@sxu.edu.cn).)

Tel.: +86 351 7016125;

Fax: +86 351 7011499.

**Fig. S1**

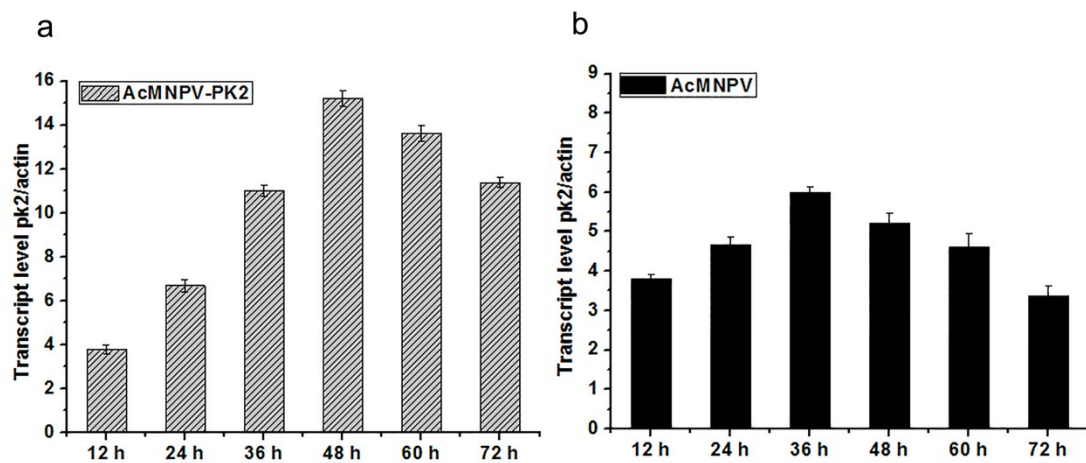

**Fig. S1** Transcription expression analysis of *pk2* gene. (a) Transcription level analysis of *pk2* gene in AcMNPV-infected group. (b) Transcription level analysis of *pk2* gene in AcMNPV-PK2-EGFP-infected group. We chose  *$\beta$ -actin* gene as reference gene.

Calculated method was  $2^{-\Delta \Delta CT}$ .

**Fig S2**

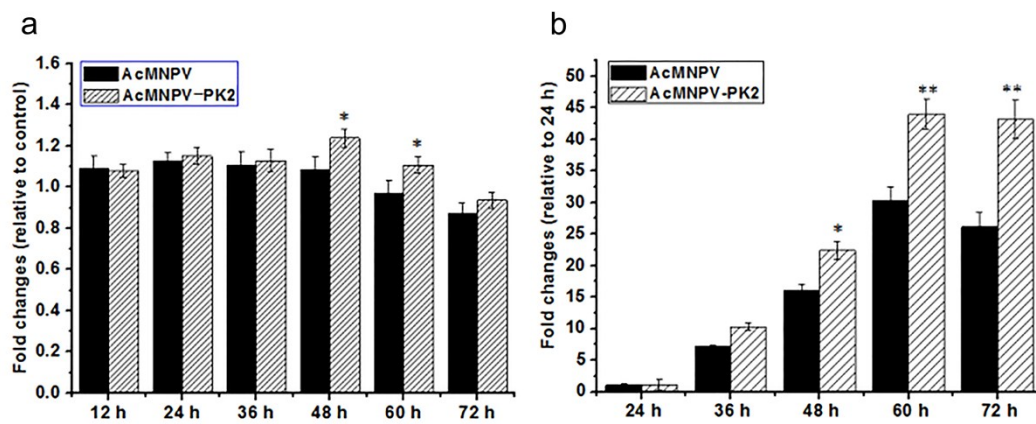

**Fig S2** Protein expression analysis of infected Sf9 cells. (a) The content of total

protein analysis of Sf9 cells infected with AcMNPV or AcMNPV-PK2-EGFP. (b)  
The content of total protein analysis of Sf9 cells co-infected with AcMNPV-Renilla-  
RFP and AcMNPV-PK2-EGFP or AcMNPV. The relative activity of renilla  
luciferase in two groups was shown. Statistical significance was determined using  
Student' s t-test. \*,  $P < 0.05$ ; \*\*,  $P < 0.05$ .

**Fig S3**

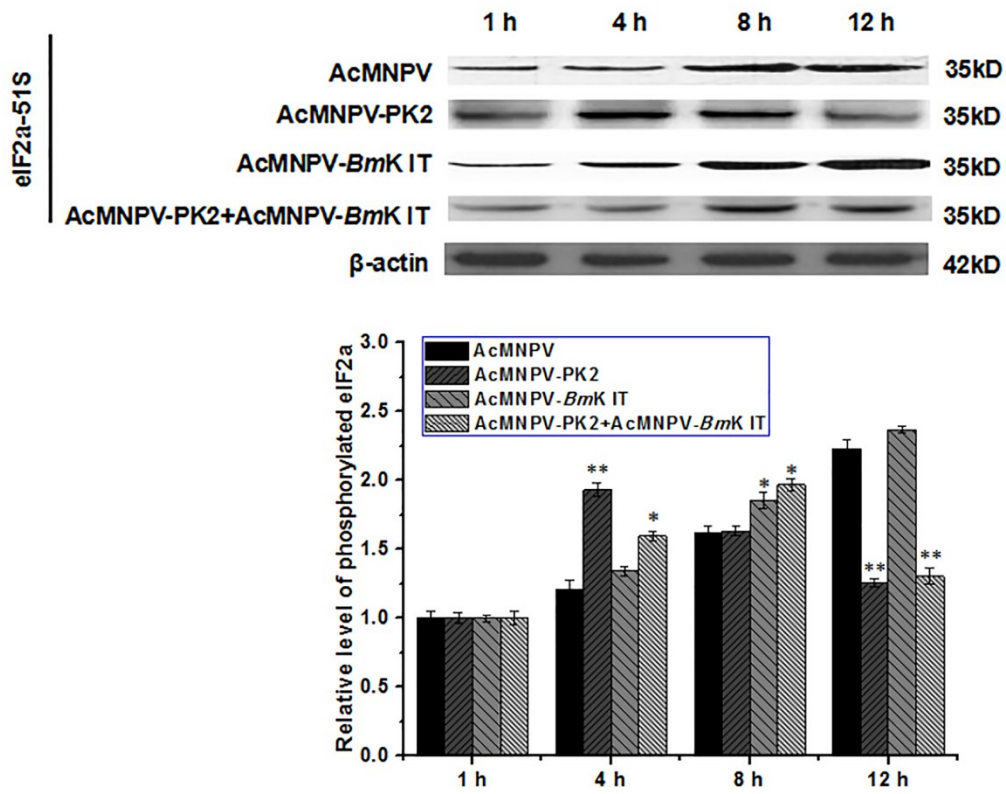

**Fig S3** Western blot analysis of eIF2α phosphorylation in midgut tissue of *Spodoptera exigua* larvae infected with AcMNPV, AcMNPV-PK2-EGFP, AcMNPV-BmK IT, and AcMNPV-PK2-EGFP+AcMNPV-BmK IT. The histogram was the relative expression quantity of eIF2α phosphorylation. (\*,  $P < 0.05$ ; \*\*,  $P < 0.01$ ).

## Table S1

**Table S1 Sequence of primers used for PCR.**

| Primer name      | Sequence                               |
|------------------|----------------------------------------|
| pk2 F            | 5'-ATACCCGGGATGAAACCCGAACAATT-3'       |
| pk2 R            | 5'-ATCCTCGAGCTAGTTTTTTAGAACACGTTG-3'   |
| Renilla F        | 5'-ATACCCGGGATGACTTCGAAAGTTTATGA-3'    |
| Renilla R        | 5' -ATCCTCGAGTTGTTTCATTTTTGAGAACTCG-3' |
| pk2 F (qPCR)     | 5'-CTTTCAACAGCCATTCAGCA-3'             |
| pk2 R (qPCR)     | 5'-CGGCAAGTTTATCCCAAGG-3'              |
| $\beta$ -actin F | 5'-AAGGCTAACCGTGAGAAGATGAC-3'          |
| $\beta$ -actin R | 5'-GATTGGGACAGTGTGGGAGAC-3'            |
